# Supplementary material
Source: Springer Nature journal article supplement (http://www.springermedizin.de/resource/supplementary/13601_2013_360_MOESM1_ESM.pdf/9677874)

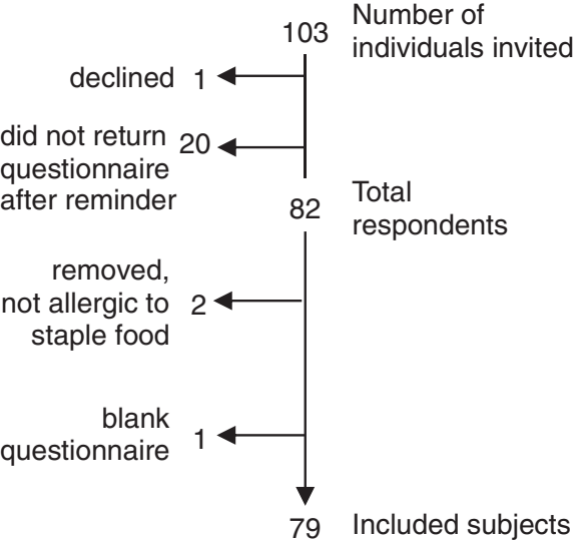

Supplement: MOESM1 [file 9677874]
